# Supplementary material
Source: PubMed Central journal article supplement (PMC6377842)
Supplement: NIHMS1517451-supplement-2.pdf [file NIHMS1517451-supplement-2.pdf]

Supplementary Fig. 1

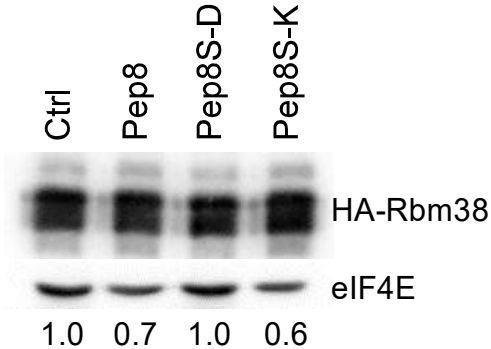

**Supplementary Fig. 1.** Pep8 reduces the Rbm38-eIF4E complex. Immunoblot for the pull-down of endogenous eIF4E by HA-tagged Rbm38 in the presence of peptide modulators (5 μM).
