# Supplementary material
Source: PubMed Central journal article supplement (PMC6377842)
Supplement: NIHMS1517451-supplement-3.pdf [file NIHMS1517451-supplement-3.pdf]

Supplementary Fig. 2

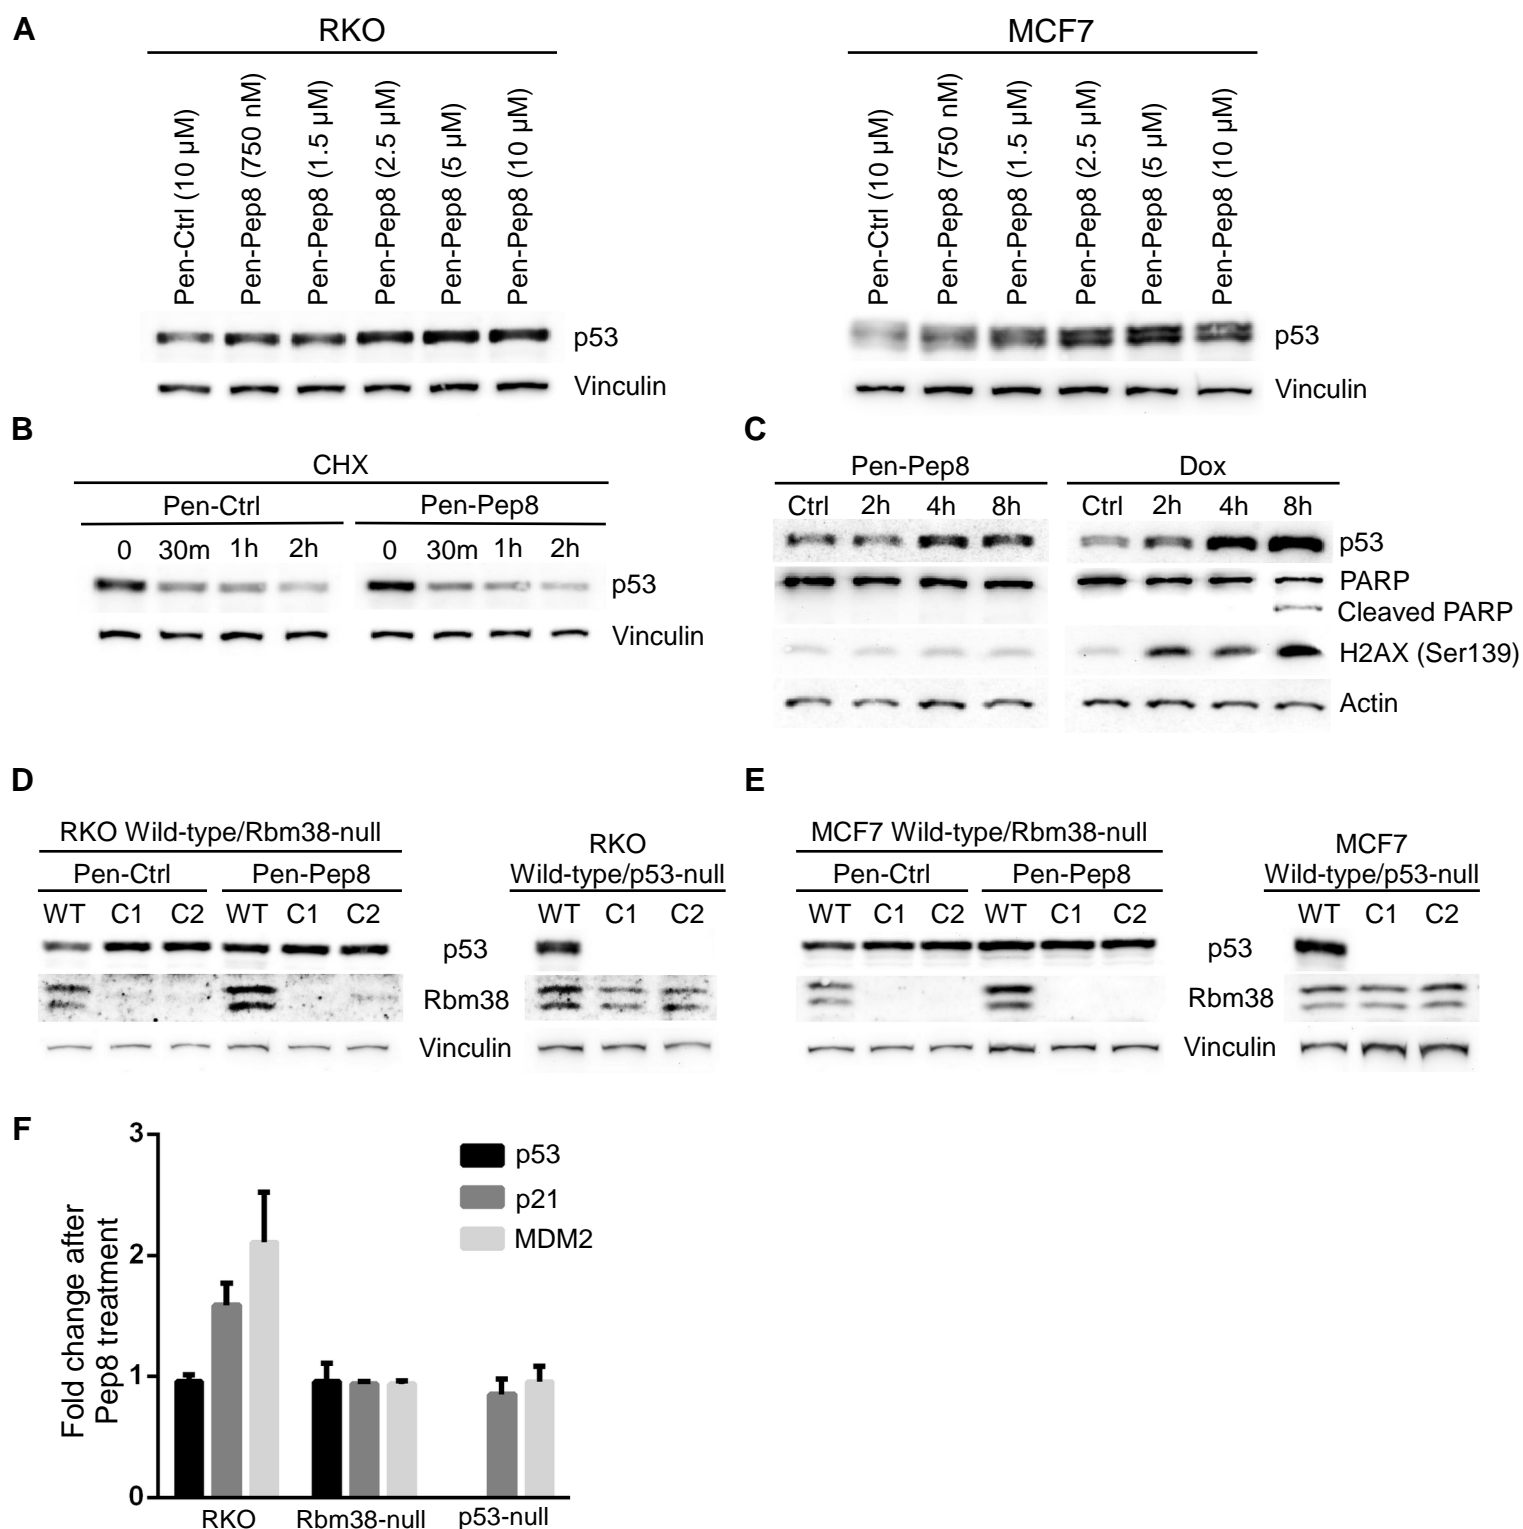

**Supplementary Fig. 2. Pep8 enhances p53 expression in a Rbm38-dependent manner.**

**A** Immunoblot for the dose response in RKO and MCF7 cells treated with the indicated amount of peptide for 18 h. **B** Immunoblot for RKO cells treated with Pen-Ctrl or Pen-Pep8 (5  $\mu$ M) for 18 h followed by indicated time with cyclohexamide (50  $\mu$ g/mL). **C** Immunoblot for RKO cells treated with 10  $\mu$ g/mL doxorubicin or 5  $\mu$ M Pen-Pep8 for 2, 4, and 8 h. **D** Immunoblot for Rbm38-null RKO clones (C1 and C2) treated with peptides (5  $\mu$ M for 18 h) and p53-null RKO clones (C1 and C2). **E** Immunoblot for Rbm38-null MCF7 clones (C1 and C2) treated with peptides (5  $\mu$ M for 18 h) and p53-null MCF7 clones (C1 and C2). **F** Quantification of the fold change of mRNA levels in RKO cells for p53, p21 and MDM2 after Pen-Pep8 treatment (5  $\mu$ M for 18 h) compared to Pen-Ctrl. Values represent the mean  $\pm$  SEM of three independent experiments.
