# Supplementary material
Source: PubMed Central journal article supplement (PMC6377842)
Supplement: NIHMS1517451-supplement-4.pdf [file NIHMS1517451-supplement-4.pdf]

Supplementary Fig. 3

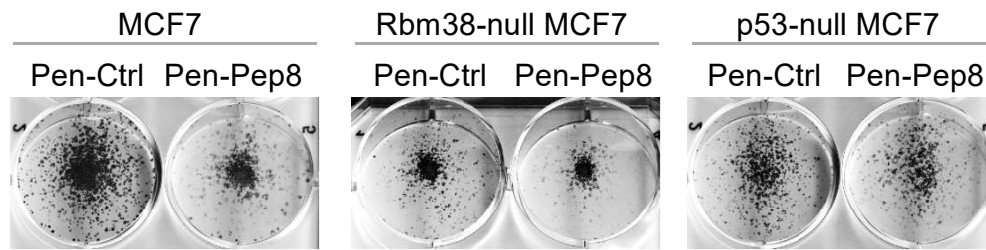

**Supplementary Fig. 3.** Pep8 inhibits tumor cell growth in Rbm38- and p53-dependent manners. Colony formation for wild-type, Rbm38- and p53-null MCF7 cells treated with penetratin-fused peptides (5  $\mu$ M).
