# Supplementary material
Source: PubMed Central journal article supplement (PMC6377842)
Supplement: NIHMS1517451-supplement-5.pdf [file NIHMS1517451-supplement-5.pdf]

Supplementary Fig. 4.

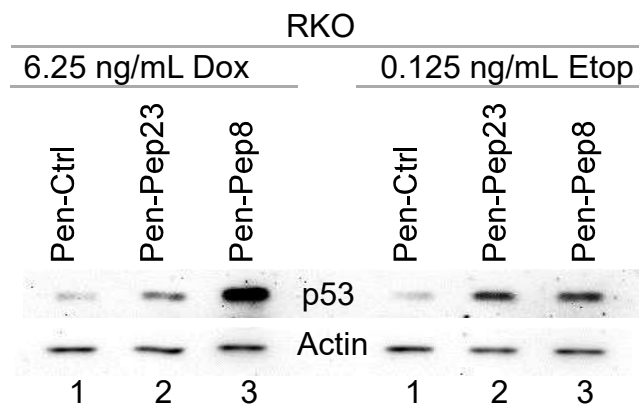

**Supplementary Fig. 4.** Pep8 and Pep23 sensitize tumor cells to p53 induction by doxorubicin and etoposide. Immunoblot for RKO cells treated with Pen-Ctrl, Pen-Pep23 or Pen-Pep8 (1.5  $\mu$ M) with the addition of either 6.25 ng/mL doxorubicin or 0.125 ng/mL etoposide for 18 h.
