# Supplementary material
Source: PubMed Central journal article supplement (PMC6377842)
Supplement: NIHMS1517451-supplement-6.pdf [file NIHMS1517451-supplement-6.pdf]

Supplementary Fig. 5

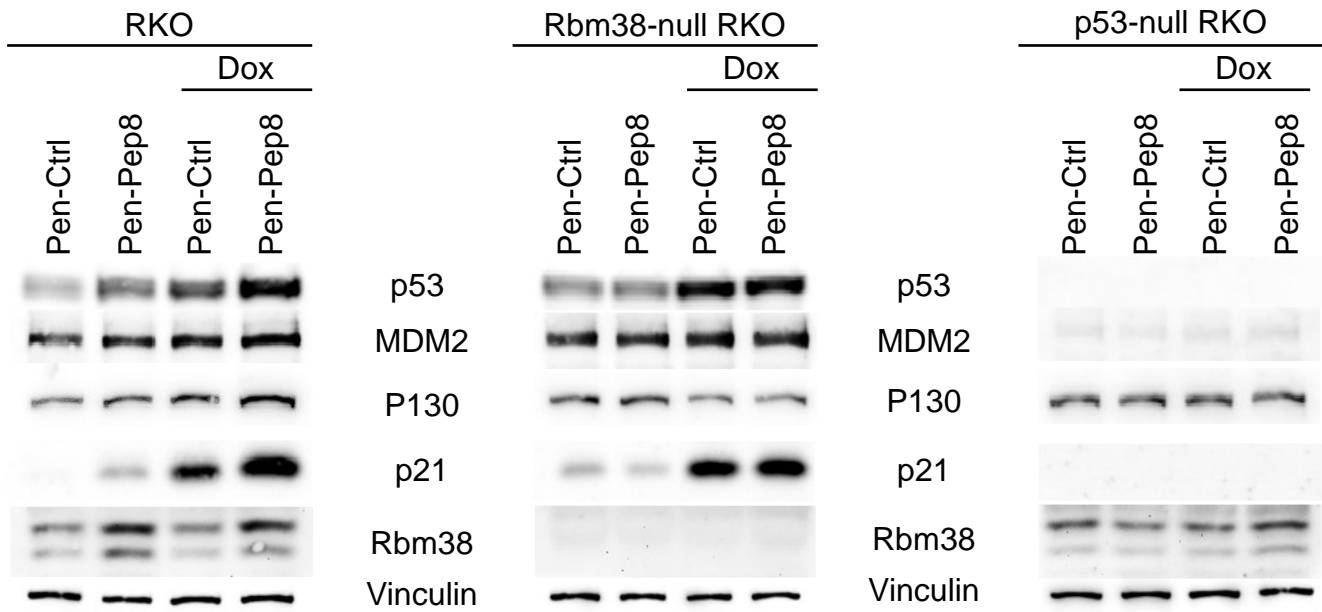

**Supplementary Fig. 5.** Pep8 sensitizes tumor cells to doxorubicin induced senescence. Immunoblot for wild-type, Rbm38- and p53-null RKO cells treated with Pen-Ctrl or Pen-Pep8 (5  $\mu$ M) with or without 6.25 ng/mL doxorubicin for 18 h.
