# Supplementary material
Source: PubMed Central journal article supplement (PMC6377842)

Supplementary Fig. 6

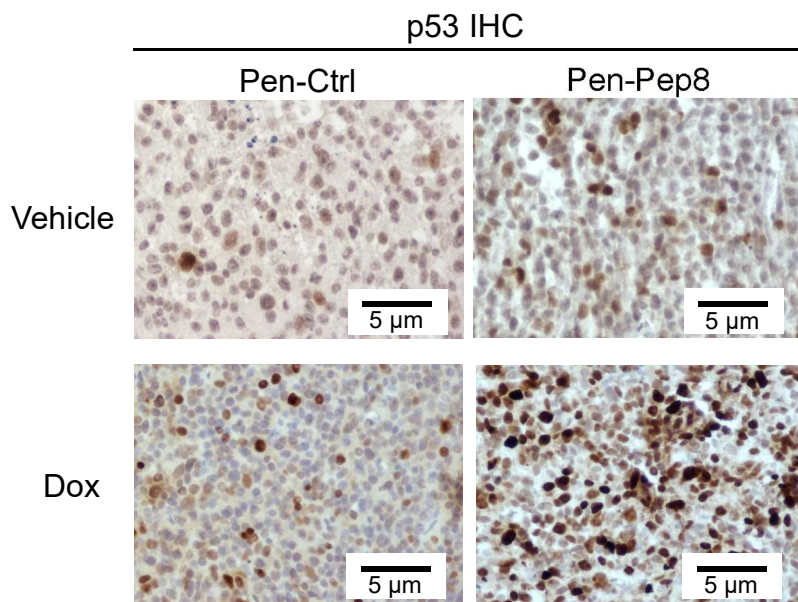

**Supplementary Fig. 6.** IHC for p53 from RKO xenograft tumors.

Supplement: NIHMS1517451-supplement-7.pdf [file NIHMS1517451-supplement-7.pdf]
